# Supplementary material
Source: publisher site journal article supplement (https://www.dovepress.com/article/593901)
Supplement: Supplementary file 1 [file 593901%20Supplementary%20file.docx]

| **Supplementary** **Table S1.** Descriptive Statistics of LPA Variables and Composite Burden Scores by Psychological–Symptom Mismatch Phenotype | | | | | |
| --- | --- | --- | --- | --- | --- |
| Variable | | Class 1  *n*=145 | Class 2  *n*=68 | Class 3  *n*=78 | Class 4  *n*=15 |
| Pulmonary function grade (GOLD stage), *n* (%) | |  |  |  |  |
|  | Grade II | 108 (74.48) | 68 (100.00) | 42 (53.85) | 10 (66.67) |
|  | Grade III | 37 (25.52) | 0 (0.00) | 36 (46.15) | 5 (33.33) |
| Symptom severity, mean (SD) | | 28.35 (3.73) | 28.57 (3.73) | 28.77 (3.56) | 30.60 (4.17) |
| Dyspea severity (mMRC grade), *n* (%) | |  |  |  |  |
|  | Grade 1 | 24 (16.55) | 8 (11.76) | 12 (15.38) | 0 (0.00) |
|  | Grade 2 | 58 (40.00) | 40 (58.82) | 28 (35.90) | 0 (0.00) |
|  | Grade 3 | 41 (28.28) | 17 (25.00) | 23 (29.49) | 5 (33.33) |
|  | Grade 4 | 22 (15.17) | 3 (4.41) | 15 (19.23) | 10 (66.67) |
| Anxiety, mean (SD) | | 9.62 (1.70) | 3.21 (2.47) | 7.47 (1.62) | 8.87 (3.94) |
| Depression, mean (SD) | | 7.50 (1.85) | 2.18 (1.66) | 5.08 (1.22) | 5.73 (2.37) |
| Psychological burden, mean (SD) | | 0.66 (0.44) | -1.32 (0.55) | -0.12 (0.06) | 0.22 (0.99) |
| Symptom burden, mean (SD) | | -0.04 (0.53) | -0.29 (0.37) | 0.19 (0.60) | 0.67 (0.05) |
| *Note.* mMRC = Modified Medical Research Council Dyspnea Scale; SD = standard deviation. Psychological burden and symptom burden were calculated as z-scores of standardized variables. Class 1 = psychological-dominant mismatch phenotype characterized by disproportionately high psychological burden relative to symptom burden; Class 2 = low psychological–symptom burden phenotype; Class 3 = moderate psychological–symptom burden phenotype; and Class 4 = high psychological–symptom burden phenotype. | | | | | |

| **Supplementary** **Table S2.** Descriptive Statistics of Outcome Measures by Psychological–Symptom Mismatch Phenotype | | | | | |
| --- | --- | --- | --- | --- | --- |
| Variable | | Class 1  *n*=145 | Class 2  *n*=68 | Class 3  *n*=78 | Class 4  *n*=15 |
| Quality of life, mean (SD) | | 11.33 (4.70) | 7.85 (2.97) | 10.63 (3.78) | 10.20 (3.97) |
| Annual number of hospitalizations, mean (SD) | | 1.30 (1.42) | 1.25 (0.92) | 0.87 (0.54) | 1.20 (1.01) |
| Health Locus of Control | |  |  |  |  |
|  | Internal control, mean (SD) | 18.90 (6.96) | 21.87 (7.39) | 12.58 (3.58) | 17.27 (6.46) |
|  | Chance control, mean (SD) | 19.43 (6.28) | 19.97 (3.69) | 11.54 (2.45) | 23.87 (4.69) |
|  | External control, mean (SD) | 31.06 (3.92) | 28.10 (5.22) | 28.28 (2.55) | 30.27 (5.38) |
| Coping Style | |  |  |  |  |
|  | Confrontation, mean (SD) | 2.45 (0.34) | 2.46 (0.41) | 2.34 (0.40) | 2.44 (0.34) |
|  | Avoidance, mean (SD) | 2.78 (0.61) | 2.81 (0.58) | 2.71 (0.67) | 2.74 (0.62) |
|  | Resignation, mean (SD) | 2.42 (0.55) | 2.35 (0.49) | 2.38 (0.48) | 2.52 (0.45) |
| Self-Management | | 177.10 (18.13) | 173.66 (21.23) | 175.38 (19.36) | 182.60 (12.52) |
|  | Symptom management, mean (SD) | 23.25 (7.28) | 22.03 (6.54) | 23.33 (6.77) | 26.67 (8.08) |
|  | Daily life management, mean (SD) | 51.12 (11.94) | 51.44 (12.00) | 51.45 (11.92) | 52.87 (12.50) |
|  | Emotional management, mean (SD) | 44.88 (9.26) | 44.60 (9.23) | 44.15 (8.54) | 43.93 (8.47) |
|  | Information management, mean (SD) | 30.40 (5.95) | 29.00 (6.13) | 28.94 (5.78) | 30.27 (6.54) |
|  | Self-efficacy, mean (SD) | 27.81 (8.52) | 26.59 (8.20) | 27.51 (8.58) | 28.87 (9.39) |
| *Note.* SD = standard deviation. Class 1 = psychological-dominant mismatch phenotype characterized by disproportionately high psychological burden relative to symptom burden; Class 2 = low psychological–symptom burden phenotype; Class 3 = moderate psychological–symptom burden phenotype; and Class 4 = high psychological–symptom burden phenotype. | | | | | |
